# Supplementary material for: Prevalence of Low Back Pain in Portuguese Equestrian Riders
Source: Preprints.org preprint supplement (doi:10.20944/preprints202406.0600.v1), 2024-06-11
Supplement: Supplementary file 1 [file supplementary]

**Supplementary Material**

**Table S1:** Distribution of respondents that reported feeling Low Back Pain in the last 12 months according to the equestrian discipline and Pearson’s Chi-square, likelihood-ratio Chi-square and p value.

| 12 month LBP | Dressage | Endurance | Eventing | General | Horseball | Jumping | Working Equitation | Total |
| --- | --- | --- | --- | --- | --- | --- | --- | --- |
| Yes | 53 | 9 | 18 | 51 | 3 | 77 | 3 | 214 |
| No | 26 | 5 | 12 | 25 | 2 | 62 | 1 | 133 |
| Total | 79 | 14 | 30 | 76 | 5 | 139 | 4 | 347 |

|  | Value | Degrees of freedom | p value |
| --- | --- | --- | --- |
| Pearson’s Chi-square | 4.629 | 6 | 0.592 |
| Likelihood ratio | 4.627 | 6 | 0.590 |

**Table S2**: Odds ratio for rider status (main occupation vs. hobby) and weekly riding workload.

|  | Rides 7 or more hours/week | Rides up to 6 hours/week | Odds Ratio | 95% Confidence Interval | p value |
| --- | --- | --- | --- | --- | --- |
| Main occupation / Hobby | 111/49 | 49/143 | 7.3622 | 4.5710 – 11.8580 | <0.0001 |

**Table S3**: Age, BMI and years of equestrian practice – comparison of groups with, and without Low Back pain in the last 12 months (p value for Mann-Whitney U test).

|  | 12 month LBP – Yes (n = 214) | 12 month LBP – No (n = 133) | p value |
| --- | --- | --- | --- |
| Age (years) | 27.16 ± 10.31 | 29.83 ± 12.24 | 0.061 |
| BMI | 22.95 ± 3.23 | 23.40 ± 3.37 | 0.178 |
| Years of equestrian practice | 16.28 ± 9.92 | 17.93 ± 11.45 | 0.245 |
